# Supplementary material
Source: publisher figshare collection journal article supplement (https://diabetesjournals.figshare.com/articles/dataset/_/21801163)
Supplement: Supplementary file 1 [file 2]

## Sheet: list
Proteomic predictors of incident diabetes: Results from the Atherosclerosis Risk in Communities (ARIC) Study
Authors: Mary R. Rooney, Jingsha Chen, Justin B. Echouffo-Tcheugui, Keenan A. Walker, Pascal Schlosser, Aditya Surapaneni, Olive Tang, Jinyu Chen, Christie M. Ballantyne, Eric Boerwinkle, Chiadi E. Ndumele, Ryan T. Demmer, James S. Pankow, Pamela L. Lutsey, Lynne E. Wagenknecht, Yujian Liang, Xueling Sim, Rob van Dam, E Shyong Tai, Morgan E. Grams, Elizabeth Selvin, Josef Coresh
LIST OF SUPPLEMENTAL TABLES
Supplemental Table 1	Protein biomarkers associated with ~20 year risk of incident diabetes in discovery: The ARIC Study
Supplemental Table 2	Results of the proteins associated with ~20 year diabetes risk, adjusted for demographics, cardiometabolic risk factors, fasting glucose, and HbA1c: The ARIC Study
Supplemental Table 3	Results of the top 50 proteins associated with ~20 year risk of diabetes, adjusted for demographics, cardiometabolic risk factors, and 10 principal components of proteins: The ARIC Study
Supplemental Table 4	List of proteins identified in discovery that replicated in the internal validation
Supplemental Table 5	Plasma protein associations with type 2 diabetes in the MEC cohort (n = 1,838): with 'Leisure-time physical activities' variable
Supplemental Table 6	Calibration of predictive model derived within the overall ARIC discovery: mean observed and predicted 20-year risk of diabetes within the internal validation set
Supplemental Table 7	The top 25 canonical pathways determined by IPA from proteins associated with incident diabetes
Supplemental Table 8	The top 25 upstream regulators predicted to be activated and inhibited by diabetes-associated proteins
Supplemental Table 9	Genetic models for the proteins that validated internally in association with diabetes risk
Supplemental Table 10	Summary of proteomics of incident diabetes publications

## Sheet: ST1 disc m1-3
Supplemental Table 1. Protein biomarkers associated with ~20 year risk of incident diabetes in discovery: The ARIC Study
Protein	Model 1				Model 2				Model 3				Protein SD	UniprotID	Gene	SeqID
	HR	HR 95% CI LL	HR 95% CI UL	p-value	HR	HR 95% CI LL	HR 95% CI UL	p-value	HR	HR 95% CI LL	HR 95% CI UL	p-value
Adiponectin	0.610742	0.577058	0.646392	4.52178e-65	0.662404	0.622025	0.705404	1.04366e-37	0.690082	0.647088	0.735933	1.28393e-29	0.602441	Q15848	ADIPOQ	SeqId_3554_24
SLIT and NTRK-like protein 3	0.613388	0.579387	0.649383	2.50888e-63	0.655918	0.618869	0.695186	7.29904e-46	0.704887	0.663268	0.749116	1.99728e-29	0.666441	O94933	SLITRK3	SeqId_10565_19
Insulin-like growth factor-binding protein 2	0.616738	0.582276	0.65324	5.60885e-61	0.662	0.622284	0.704252	5.07417e-39	0.717086	0.671556	0.765702	2.89099e-23	0.765785	P18065	IGFBP2	SeqId_8469_41
Apolipoprotein F	0.698416	0.670575	0.727414	5.24783e-67	0.743314	0.710758	0.777362	1.55971e-38	0.781846	0.743854	0.821777	3.5511e-22	0.610727	Q13790	APOF	SeqId_12370_30
Serine protease HTRA1	1.52776	1.4527	1.6067	4.48475e-61	1.4288	1.35507	1.50653	8.61241e-40	1.32603	1.25223	1.40419	4.54622e-22	0.296523	Q92743	HTRA1	SeqId_15594_47
Beta-glucuronidase	1.49927	1.42052	1.58238	5.46104e-49	1.39629	1.32153	1.47528	1.33591e-32	1.31944	1.2465	1.39665	1.25219e-21	0.754027	P08236	GUSB	SeqId_15562_24
Carboxypeptidase M	1.45667	1.38567	1.53131	2.89296e-49	1.36968	1.29833	1.44496	1.00215e-30	1.30426	1.23315	1.37946	1.58001e-20	0.327974	P14384	CPM	SeqId_9416_77
Growth hormone receptor	1.54359	1.45632	1.63609	2.09711e-48	1.44887	1.36286	1.5403	1.60034e-32	1.35648	1.27194	1.44665	1.59846e-20	0.493847	P10912	GHR	SeqId_2948_58
Insulin	1.28633	1.2423	1.33193	1.43188e-45	1.24974	1.20414	1.29705	6.45455e-32	1.20637	1.15826	1.25647	1.61274e-19	0.339757	P01308	INS	SeqId_4883_56
Insulin-like growth factor-binding protein 1	0.645884	0.61518	0.67812	2.8737e-69	0.697545	0.661496	0.735558	2.1871e-40	0.764728	0.720261	0.811941	1.69708e-18	0.915234	P08833	IGFBP1	SeqId_2771_35
Receptor-type tyrosine-protein phosphatase U	1.4081	1.34799	1.47089	2.38648e-53	1.33019	1.26727	1.39624	8.32471e-31	1.26193	1.19737	1.32999	3.90088e-18	0.417882	Q92729	PTPRU	SeqId_8337_65
Retinol-binding protein 5	1.36739	1.30739	1.43014	1.58091e-42	1.29267	1.23062	1.35785	1.4833e-24	1.24254	1.18046	1.30789	1.00896e-16	0.394761	P82980	RBP5	SeqId_19241_31
Matrix-remodeling-associated protein 8	0.642465	0.607402	0.679552	7.32601e-54	0.705273	0.658497	0.755372	2.01171e-23	0.746679	0.695877	0.80119	4.45633e-16	0.272469	Q9BRK3	MXRA8	SeqId_10521_10
Procollagen-lysine,2-oxoglutarate 5-dioxygenase 2	1.30894	1.25515	1.36505	2.97518e-36	1.26267	1.2073	1.32059	2.13677e-24	1.21737	1.15982	1.27777	1.71786e-15	0.394381	O00469	PLOD2	SeqId_6923_1
Reticulon-4 receptor	1.42044	1.34559	1.49944	5.31496e-37	1.32957	1.25661	1.40676	4.46605e-23	1.26176	1.19013	1.33769	6.32994e-15	0.348821	Q9BZR6	RTN4R	SeqId_5105_2
Afamin	1.402	1.32348	1.48518	1.46225e-30	1.34847	1.27287	1.42856	3.11021e-24	1.26265	1.19008	1.33965	1.14959e-14	0.229028	P43652	AFM	SeqId_4763_31
Inhibin beta C chain	1.46537	1.38524	1.55013	1.82261e-40	1.35593	1.28061	1.43568	1.59256e-25	1.25449	1.18224	1.33116	6.80044e-14	0.479082	P55103	INHBC	SeqId_6408_2
Proto-oncogene tyrosine-protein kinase receptor Ret	1.29847	1.23667	1.36337	8.93495e-26	1.27772	1.21378	1.34503	8.21005e-21	1.21961	1.15658	1.28607	2.25286e-13	0.661033	P07949	RET	SeqId_3220_40
Chordin-like protein 1	0.729709	0.690267	0.771405	1.06686e-28	0.768579	0.726265	0.813359	8.24663e-20	0.805478	0.760132	0.853529	2.53389e-13	0.252598	Q9BU40	CHRDL1	SeqId_3362_61
Tubulointerstitial nephritis antigen-like	0.707519	0.667753	0.749654	9.74647e-32	0.74076	0.695785	0.788642	6.00459e-21	0.788639	0.740018	0.840455	2.60352e-13	0.317648	Q9GZM7	TINAGL1	SeqId_11192_168
Alcohol dehydrogenase 1A	1.30483	1.25111	1.36086	2.51193e-35	1.24168	1.18755	1.29827	1.75067e-21	1.18878	1.1347	1.24543	3.35292e-13	0.442378	P07327	ADH1A	SeqId_17396_23
Aminoacylase-1	1.3372	1.26979	1.40818	3.36831e-28	1.27136	1.20643	1.33978	2.78622e-19	1.21689	1.154	1.2832	4.13586e-13	0.960901	Q03154	ACY1	SeqId_3343_1
Phosphoserine aminotransferase	1.30601	1.24611	1.36879	7.61664e-29	1.25361	1.19392	1.31628	1.08113e-19	1.20061	1.14177	1.26247	9.92052e-13	0.679102	Q9Y617	PSAT1	SeqId_18342_2
ADAMTS-like protein 1	0.712074	0.675586	0.750532	1.07885e-36	0.75816	0.717605	0.801007	5.58624e-23	0.81129	0.76523	0.860123	2.33846e-12	0.300404	Q8N6G6	ADAMTSL1	SeqId_16890_37
Netrin receptor UNC5D	0.649411	0.613246	0.687709	2.4246e-49	0.712028	0.670658	0.75595	9.91696e-29	0.79407	0.743545	0.848029	6.2314e-12	0.356427	Q6UXZ4	UNC5D	SeqId_16307_22
Cell adhesion molecule 2	0.655522	0.61759	0.695784	7.62944e-44	0.719959	0.675664	0.767157	3.61183e-24	0.792509	0.741167	0.847408	1.00977e-11	0.280649	Q8N3J6	CADM2	SeqId_16907_3
Transforming growth factor beta receptor type 3	0.73434	0.695627	0.775208	5.42866e-29	0.803428	0.75939	0.85002	2.74852e-14	0.820508	0.775052	0.86863	1.02245e-11	0.217673	Q03167	TGFBR3	SeqId_3009_3
Lysosomal Pro-X carboxypeptidase	1.39816	1.31305	1.48878	1.31816e-25	1.29615	1.21664	1.38086	9.6515e-16	1.24298	1.16703	1.32387	1.36213e-11	0.384828	P42785	PRCP	SeqId_5722_78
Desmoglein-2	0.734483	0.695528	0.77562	1.27662e-28	0.800015	0.755199	0.847491	3.30404e-14	0.818063	0.771533	0.867398	1.80126e-11	0.28476	Q14126	DSG2	SeqId_9484_75
Receptor-type tyrosine-protein phosphatase S	0.789845	0.748463	0.833515	8.52588e-18	0.81977	0.776261	0.865718	9.17709e-13	0.831575	0.787191	0.878462	4.38938e-11	0.205259	Q13332	PTPRS	SeqId_6049_64
Vesicular, overexpressed in cancer, prosurvival protein 1	0.651504	0.611814	0.693768	1.02459e-40	0.729294	0.675203	0.787719	9.85712e-16	0.777397	0.720007	0.839361	1.23193e-10	0.335933	Q96AW1	VOPP1	SeqId_14618_26
Leukocyte cell-derived chemotaxin-2	1.45307	1.36195	1.55027	1.17036e-29	1.33106	1.24673	1.42109	1.09476e-17	1.23616	1.15762	1.32003	2.45048e-10	0.526203	O14960	LECT2	SeqId_16763_11
Plasminogen activator inhibitor 1	1.41263	1.34268	1.48622	1.50828e-40	1.29471	1.22624	1.367	1.19182e-20	1.20269	1.13575	1.27358	2.67786e-10	0.929055	P05121	SERPINE1	SeqId_2925_9
ADP-ribosylation factor-like protein 15	1.292	1.23898	1.34729	4.36282e-33	1.22306	1.16807	1.28065	9.61135e-18	1.16786	1.11198	1.22654	5.52088e-10	0.359105	Q9NXU5	ARL15	SeqId_18411_83
Sex hormone-binding globulin	0.685651	0.647611	0.725924	2.09199e-38	0.757174	0.711384	0.805911	2.33774e-18	0.81562	0.764635	0.870005	6.0845e-10	0.848752	P04278	SHBG	SeqId_4929_55
Alcohol dehydrogenase 4	1.3021	1.24191	1.36521	8.15113e-28	1.23607	1.17631	1.29886	5.1565e-17	1.17508	1.11628	1.23698	7.28302e-10	0.708145	P08319	ADH4	SeqId_8325_37
Galectin-3-binding protein	1.33755	1.2709	1.40768	6.912e-29	1.25654	1.19176	1.32484	2.77219e-17	1.18651	1.12315	1.25345	1.01286e-09	0.520437	Q08380	LGALS3BP	SeqId_5000_52
3-oxo-5-beta-steroid 4-dehydrogenase	1.23621	1.18906	1.28523	1.16583e-26	1.19091	1.1423	1.24159	2.08263e-16	1.14581	1.0968	1.19701	1.04069e-09	0.442658	P51857	AKR1D1	SeqId_18398_1
Neurofascin	1.18711	1.13844	1.23786	9.72028e-16	1.14688	1.09963	1.19615	1.7135e-10	1.14809	1.09813	1.20032	1.17283e-09	0.200179	O94856	NFASC	SeqId_7179_69
Sodium/potassium-transporting ATPase subunit beta-2	0.71065	0.673261	0.750115	3.07031e-35	0.764049	0.722312	0.808197	6.00585e-21	0.831332	0.783258	0.882357	1.21625e-09	0.290505	P14415	ATP1B2	SeqId_7218_87
ADAMTS-like protein 2	1.28281	1.22518	1.34314	2.3903e-26	1.21625	1.15819	1.27721	4.31882e-15	1.17009	1.11198	1.23123	1.50409e-09	0.31452	Q86TH1	ADAMTSL2	SeqId_6379_62
Ecto-ADP-ribosyltransferase 3	0.672732	0.63443	0.713346	4.27964e-40	0.740743	0.696378	0.787933	1.67008e-21	0.819104	0.76692	0.874838	2.82948e-09	0.392129	Q13508	ART3	SeqId_7970_315
Protocadherin-10	0.667432	0.625288	0.712417	5.7897e-34	0.731972	0.685251	0.781878	1.8311e-20	0.815752	0.76253	0.872688	3.30068e-09	0.33125	Q9P2E7	PCDH10	SeqId_9018_38
Alcohol dehydrogenase 1C	1.26941	1.2099	1.33185	2.08756e-22	1.20599	1.14774	1.2672	1.21787e-13	1.16256	1.10575	1.22229	3.79892e-09	0.894842	P00326	ADH1C	SeqId_15525_294
Neuronal growth regulator 1	0.746199	0.706699	0.787908	5.07233e-26	0.812648	0.768068	0.859816	5.72924e-13	0.842089	0.795098	0.891858	4.45181e-09	0.177924	Q7Z3B1	NEGR1	SeqId_13109_82
Glutathione S-transferase A1	1.21808	1.17146	1.26656	3.87235e-23	1.17679	1.12902	1.22658	1.37019e-14	1.138	1.08968	1.18845	5.21768e-09	0.375348	P08263	GSTA1	SeqId_17138_8
Fructose-1,6-bisphosphatase 1	1.27441	1.21598	1.33565	4.23867e-24	1.21152	1.15273	1.2733	4.00564e-14	1.16371	1.10563	1.22484	6.48533e-09	0.660509	P09467	FBP1	SeqId_7206_20
RGM domain family member B	0.72709	0.68716	0.769341	1.98187e-28	0.776818	0.731379	0.825079	2.16858e-16	0.83024	0.779568	0.884207	7.0362e-09	0.196788	Q6NW40	RGMB	SeqId_3331_8
Glutaminyl-peptide cyclotransferase-like protein	0.745967	0.708582	0.785325	5.60235e-29	0.797685	0.756309	0.841324	8.95794e-17	0.848417	0.801847	0.897691	1.14929e-08	0.358904	Q9NXS2	QPCTL	SeqId_8866_53
Melanoma-associated antigen 10	1.16865	1.12562	1.21332	3.88528e-16	1.15479	1.11045	1.2009	5.83962e-13	1.13057	1.08389	1.17926	1.16433e-08	0.313524	P43363	MAGEA10	SeqId_13610_9
Receptor-type tyrosine-protein phosphatase delta	0.686782	0.648649	0.727157	5.02008e-38	0.745213	0.702656	0.790347	1.10138e-22	0.831721	0.78065	0.886134	1.20613e-08	0.317168	P23468	PTPRD	SeqId_9296_15
Growth arrest-specific protein 1	0.738466	0.695004	0.784645	1.16584e-22	0.791118	0.742937	0.842423	2.69951e-13	0.831857	0.780761	0.886297	1.25623e-08	0.260378	P54826	GAS1	SeqId_5463_22
WAP, Kazal, immunoglobulin, Kunitz and NTR domain-containing protein 2	0.709589	0.671895	0.749398	7.1901e-35	0.768243	0.725916	0.813039	7.64799e-20	0.840139	0.791142	0.89217	1.33508e-08	0.335228	Q8TEU8	WFIKKN2	SeqId_3235_50
Hepatocyte growth factor receptor	0.762895	0.724272	0.803577	1.79034e-24	0.814699	0.771846	0.859931	1.05666e-13	0.852686	0.807024	0.900932	1.386e-08	0.237886	P08581	MET	SeqId_2837_3
Secretogranin-3	0.69449	0.658024	0.732977	4.6301e-40	0.758378	0.716462	0.802747	1.51476e-21	0.838017	0.788071	0.891128	1.73626e-08	0.313674	Q8WXD2	SCG3	SeqId_7957_2
Ribonuclease UK114	1.28011	1.2202	1.34296	5.67309e-24	1.20327	1.14358	1.26607	1.01378e-12	1.16286	1.10328	1.22566	1.88219e-08	0.566393	P52758	RIDA	SeqId_14636_25
Kallikrein-14	0.756205	0.717901	0.796553	5.86851e-26	0.796517	0.754805	0.840533	1.13301e-16	0.851088	0.804552	0.900317	1.90809e-08	0.469441	Q9P0G3	KLK14	SeqId_15544_25
Tubulin polymerization-promoting protein family member 2	0.881428	0.832226	0.933538	1.65696e-05	0.886495	0.836917	0.939009	4.07597e-05	0.845164	0.79696	0.896284	1.97279e-08	0.402499	P59282	TPPP2	SeqId_12800_5
Cathepsin B	0.754061	0.710906	0.799835	6.10856e-21	0.800937	0.753933	0.850872	6.31352e-13	0.838028	0.787802	0.891456	2.09847e-08	0.443386	P07858	CTSB	SeqId_8007_19
Transmembrane protein 132C	0.803427	0.76723	0.841331	1.33441e-20	0.842801	0.801733	0.885972	1.94487e-11	0.866447	0.823514	0.911618	3.22617e-08	0.344886	Q8N3T6	TMEM132C	SeqId_7173_141
Agrin	1.32807	1.2638	1.39561	3.59742e-29	1.2301	1.16758	1.29597	7.1679e-15	1.16548	1.10377	1.23064	3.45162e-08	0.312928	O00468	AGRN	SeqId_15483_377
Fibrinogen	0.795988	0.753615	0.840742	2.94836e-16	0.839528	0.793709	0.887991	1.00493e-09	0.851508	0.80419	0.901609	3.5761e-08	0.230662	P02679|P02675|P02671	FGA|FGB|FGG	SeqId_2796_62
Heparan-sulfate 6-O-sulfotransferase 2	0.713354	0.668693	0.760998	1.31622e-24	0.77506	0.726149	0.827266	1.83655e-14	0.830893	0.777791	0.887621	3.84657e-08	0.33949	Q96MM7	HS6ST2	SeqId_13524_25
Gelsolin	0.792489	0.75222	0.834913	2.30934e-18	0.836723	0.79276	0.883124	9.58122e-11	0.859118	0.813664	0.907112	4.37489e-08	0.187052	P06396	GSN	SeqId_16607_78
Formimidoyltransferase-cyclodeaminase	1.20616	1.15014	1.26492	1.12716e-14	1.17616	1.12054	1.23453	5.19932e-11	1.14427	1.09001	1.20124	5.42875e-08	1.10529	O95954	FTCD	SeqId_9213_24
Neuronal growth regulator 1	0.737019	0.691228	0.785844	1.12343e-20	0.804828	0.754612	0.858385	3.95967e-11	0.836714	0.784321	0.892607	6.53862e-08	0.172075	Q7Z3B1	NEGR1	SeqId_7050_5
Cyclic AMP-dependent transcription factor ATF-6 alpha	1.27842	1.20398	1.35747	1.01942e-15	1.24346	1.17034	1.32114	1.8281e-12	1.18665	1.1152	1.26268	6.61552e-08	0.29151	P18850	ATF6	SeqId_11277_23
Methyl-CpG-binding domain protein 1	1.18886	1.1355	1.24472	1.54258e-13	1.15501	1.10171	1.21089	2.2515e-09	1.14172	1.08782	1.1983	7.82977e-08	0.402087	Q9UIS9	MBD1	SeqId_14294_61
Sialic acid-binding Ig-like lectin 12	1.25679	1.18804	1.32952	1.6767e-15	1.19736	1.13156	1.26699	4.2163e-10	1.16859	1.10393	1.23704	8.11071e-08	0.418208	Q96PQ1	SIGLEC12	SeqId_8352_26
Fructose-bisphosphate aldolase B	1.23207	1.17422	1.29278	1.82108e-17	1.18761	1.13009	1.24805	1.13032e-11	1.14846	1.09147	1.20842	9.80225e-08	0.641794	P05062	ALDOB	SeqId_18185_118
Anterior gradient protein 3	1.23103	1.16736	1.29816	1.69682e-14	1.21073	1.14572	1.27943	1.11144e-11	1.16435	1.10089	1.23147	1.02857e-07	0.907119	Q8TD06	AGR3	SeqId_17342_13
Dickkopf-related protein 3	0.722948	0.68497	0.763032	4.76435e-32	0.792298	0.749561	0.837473	1.8853e-16	0.854831	0.806774	0.905751	1.07732e-07	0.272844	Q9UBP4	DKK3	SeqId_3607_71
Interleukin-1 receptor antagonist protein	1.29223	1.24111	1.34546	1.4196e-35	1.22656	1.1734	1.28213	1.66188e-19	1.14077	1.0863	1.19797	1.32068e-07	0.44459	P18510	IL1RN	SeqId_5353_89
Beta-defensin 1	1.21454	1.14873	1.28412	8.01226e-12	1.15942	1.09692	1.22548	1.67737e-07	1.16134	1.09822	1.22808	1.55329e-07	0.420231	P60022	DEFB1	SeqId_6629_3
Attractin	1.18965	1.12616	1.25672	5.44237e-10	1.17709	1.1134	1.24442	9.19573e-09	1.16186	1.09847	1.2289	1.5958e-07	0.20415	O75882	ATRN	SeqId_15499_11
Tolloid-like protein 1	1.22152	1.15619	1.29054	9.67107e-13	1.17754	1.11322	1.24557	1.17773e-08	1.16143	1.09765	1.22891	2.06645e-07	0.278216	O43897	TLL1	SeqId_6383_90
Inhibin beta A chain	1.22963	1.17785	1.28369	4.63451e-21	1.17248	1.11624	1.23156	2.22881e-10	1.14568	1.08833	1.20606	2.09569e-07	0.406242	P08476	INHBA	SeqId_13738_8
Neurogenic locus notch homolog protein 3	0.766932	0.725241	0.81102	1.34155e-20	0.837392	0.789146	0.888588	4.59113e-09	0.855922	0.806921	0.907898	2.31211e-07	0.211317	Q9UM47	NOTCH3	SeqId_5108_72
Inactive tyrosine-protein kinase transmembrane receptor ROR1	0.752845	0.71177	0.79629	3.48605e-23	0.806626	0.761746	0.85415	1.87496e-13	0.855649	0.806493	0.907801	2.41277e-07	0.302323	Q01973	ROR1	SeqId_2590_69
Coagulation factor IX	1.3675	1.28827	1.4516	8.82576e-25	1.25782	1.18507	1.33504	4.48889e-14	1.16993	1.10196	1.24208	2.75479e-07	0.232607	P00740	F9	SeqId_4876_32
Protein-tyrosine sulfotransferase 2	1.12693	1.08814	1.1671	2.27176e-11	1.12182	1.07904	1.1663	6.87242e-09	1.111	1.06721	1.15658	2.88238e-07	0.179264	O60704	TPST2	SeqId_8024_64
Interleukin-1 receptor type 2	1.13498	1.08055	1.19216	4.43514e-07	1.1459	1.09151	1.20299	4.03465e-08	1.14213	1.08545	1.20176	3.09402e-07	0.274412	P27930	IL1R2	SeqId_14133_93
Adenylosuccinate synthetase isozyme 1	1.22456	1.17158	1.27993	2.76189e-19	1.17722	1.12346	1.23355	7.81797e-12	1.13464	1.08099	1.19096	3.21226e-07	0.596853	Q8N142	ADSS1	SeqId_13998_26
Semaphorin-3C	1.17348	1.12435	1.22475	2.27348e-13	1.13928	1.08978	1.19104	8.77254e-09	1.12852	1.07734	1.18213	3.28583e-07	0.29858	Q99985	SEMA3C	SeqId_6448_36
NT-3 growth factor receptor	0.749882	0.711494	0.790341	6.90438e-27	0.798281	0.755191	0.84383	1.75427e-15	0.859754	0.811175	0.911241	3.53942e-07	0.288811	Q16288	NTRK3	SeqId_2658_27
ATP-dependent DNA helicase Q1	1.21423	1.1621	1.26869	4.29618e-18	1.16864	1.11441	1.2255	1.28627e-10	1.13793	1.08239	1.19631	4.16851e-07	0.433232	P46063	RECQL	SeqId_11431_235
L-xylulose reductase	1.22706	1.1708	1.28601	1.27513e-17	1.17178	1.11595	1.2304	1.95526e-10	1.13843	1.08257	1.19718	4.40992e-07	0.617343	Q7Z4W1	DCXR	SeqId_17758_79
Inter-alpha-trypsin inhibitor heavy chain H3	0.819337	0.777803	0.863089	6.03922e-14	0.856466	0.812032	0.903332	1.19695e-08	0.871118	0.825318	0.91946	5.52373e-07	0.376736	Q06033	ITIH3	SeqId_7145_1
Glycolipid transfer protein domain-containing protein 2	1.34993	1.27591	1.42824	1.83783e-25	1.27886	1.20574	1.3564	2.6372e-16	1.16984	1.09996	1.24417	5.98832e-07	0.323194	A6NH11	GLTPD2	SeqId_7948_129
C-C motif chemokine 25	1.25655	1.18851	1.32848	8.94662e-16	1.218	1.15088	1.28903	9.18201e-12	1.15708	1.09265	1.22531	6.00711e-07	0.666364	O15444	CCL25	SeqId_2705_5
Insulin-like growth factor-binding protein 4	1.26173	1.19533	1.33182	3.51391e-17	1.19288	1.12813	1.26135	5.85831e-10	1.15649	1.09229	1.22446	6.05715e-07	0.310504	P22692	IGFBP4	SeqId_2950_57
Gelsolin	0.821073	0.776246	0.868488	5.88203e-12	0.849958	0.802141	0.900625	3.73748e-08	0.864261	0.815794	0.915608	7.2639e-07	0.221119	P06396	GSN	SeqId_4775_34
Liver carboxylesterase 1	1.24124	1.18202	1.30344	4.57142e-18	1.18029	1.12257	1.24098	9.20903e-11	1.13803	1.08117	1.19789	7.65272e-07	0.433283	P23141	CES1	SeqId_15487_164
Prostaglandin reductase 1	1.28516	1.2154	1.35892	1.24893e-18	1.22238	1.15563	1.29299	2.41469e-12	1.15512	1.09081	1.22322	8.05857e-07	0.741407	Q14914	PTGR1	SeqId_19617_5
UDP-glucuronic acid decarboxylase 1	1.11602	1.0586	1.17655	4.63813e-05	1.13236	1.07332	1.19465	5.36991e-06	1.14301	1.08303	1.2063	1.17176e-06	0.296965	Q8NBZ7	UXS1	SeqId_8258_22
Ciliary neurotrophic factor receptor subunit alpha	0.816189	0.768723	0.866585	3.04808e-11	0.851525	0.800543	0.905755	3.35408e-07	0.857488	0.805765	0.91253	1.27528e-06	0.256869	P26992	CNTFR	SeqId_14101_2
Protein S100-A4	0.843469	0.795289	0.894568	1.40686e-08	0.873632	0.824011	0.926241	5.95104e-06	0.866846	0.817643	0.91901	1.64537e-06	0.338823	P26447	S100A4	SeqId_14116_129
C-reactive protein	1.36811	1.29006	1.45088	1.34705e-25	1.27689	1.20185	1.35661	2.57073e-15	1.16766	1.09591	1.24411	1.66392e-06	1.08589	P02741	CRP	SeqId_4337_49
Non-histone chromosomal protein HMG-14	1.20044	1.15024	1.25282	5.17212e-17	1.15532	1.10371	1.20934	5.95277e-10	1.12541	1.07221	1.18125	1.73491e-06	0.307887	P05114	HMGN1	SeqId_9187_2
Fibroblast growth factor-binding protein 1	0.827792	0.782772	0.8754	3.49218e-11	0.870169	0.822579	0.920513	1.25844e-06	0.871278	0.823409	0.92193	1.7588e-06	0.443167	Q14512	FGFBP1	SeqId_15494_11
Procollagen-lysine,2-oxoglutarate 5-dioxygenase 3	1.27025	1.20738	1.33638	2.53261e-20	1.21244	1.1503	1.27794	7.16481e-13	1.14266	1.08183	1.2069	1.77024e-06	0.295585	O60568	PLOD3	SeqId_10612_18
Fumarylacetoacetase	1.2334	1.17901	1.2903	7.7445e-20	1.18791	1.13127	1.24738	4.91829e-12	1.13328	1.07658	1.19297	1.77291e-06	0.461506	P16930	FAH	SeqId_11424_4
D-dimer	0.830798	0.78557	0.87863	8.56007e-11	0.865106	0.817182	0.91584	6.24594e-07	0.868417	0.819555	0.920192	1.79754e-06	0.344212	P02679|P02675|P02671	FGA|FGB|FGG	SeqId_4907_56
Sialic acid-binding Ig-like lectin 7	1.1778	1.13039	1.2272	5.87099e-15	1.13509	1.08482	1.18769	4.19709e-08	1.12216	1.07027	1.17656	1.83193e-06	0.261152	Q9Y286	SIGLEC7	SeqId_2742_68
Fibrinogen gamma chain	0.833808	0.78868	0.881518	1.53228e-10	0.866641	0.819057	0.916989	6.77441e-07	0.869849	0.821423	0.921129	1.83265e-06	0.333235	P02679	FGG	SeqId_4989_7
Metalloproteinase inhibitor 4	0.892452	0.842096	0.945819	0.000123131	0.934752	0.881474	0.991251	0.0242308	0.862544	0.811557	0.916735	1.97065e-06	0.380867	Q99727	TIMP4	SeqId_6462_12
Endothelial cell-selective adhesion molecule	0.762979	0.719791	0.808757	9.06511e-20	0.821489	0.773508	0.872447	1.51548e-10	0.861851	0.810454	0.916508	2.14779e-06	0.270419	Q96AP7	ESAM	SeqId_7841_84
Aldo-keto reductase family 1 member C4	1.22008	1.16279	1.2802	5.2514e-16	1.16834	1.11198	1.22756	6.94112e-10	1.13026	1.07443	1.189	2.16411e-06	0.720622	P17516	AKR1C4	SeqId_18397_5
Dihydropteridine reductase	1.22731	1.17197	1.28526	3.28089e-18	1.16906	1.11302	1.22791	4.5903e-10	1.13017	1.07432	1.18892	2.22053e-06	0.369038	P09417	QDPR	SeqId_11257_1
Transmembrane and coiled-coil domains protein 3	1.23865	1.18244	1.29752	1.67374e-19	1.15377	1.09275	1.2182	2.48127e-07	1.1411	1.08012	1.20552	2.47383e-06	0.445393	Q9ULS5	TMCC3	SeqId_8922_4
Suppressor of cytokine signaling 3	1.17936	1.1351	1.22534	2.84355e-17	1.14461	1.09595	1.19544	1.10755e-09	1.11664	1.06643	1.16922	2.60254e-06	0.354158	O14543	SOCS3	SeqId_11440_58
Complement factor H-related protein 1	1.26606	1.19407	1.34238	2.81971e-15	1.20124	1.13241	1.27426	1.13069e-09	1.15278	1.0864	1.22321	2.62097e-06	0.346488	Q03591	CFHR1	SeqId_15468_14
Ankyrin repeat and SOCS box protein 9	0.82181	0.772769	0.873965	4.07394e-10	0.848918	0.797795	0.903318	2.35881e-07	0.863357	0.811861	0.91812	2.83386e-06	0.414538	Q96DX5	ASB9	SeqId_19601_15
Asialoglycoprotein receptor 1	1.22703	1.17041	1.2864	2.11716e-17	1.16934	1.11242	1.22918	8.06059e-10	1.13215	1.07476	1.1926	2.92069e-06	0.247165	P07306	ASGR1	SeqId_5452_71
Amyloid-like protein 2	0.806104	0.757234	0.858128	1.42945e-11	0.833903	0.783696	0.887326	9.85513e-09	0.864612	0.813339	0.919117	3.10086e-06	0.193829	Q06481	APLP2	SeqId_10627_87
SLIT and NTRK-like protein 6	0.768709	0.721455	0.819057	4.42191e-16	0.833112	0.782593	0.886893	1.06095e-08	0.864097	0.812562	0.918901	3.22931e-06	0.269425	Q9H5Y7	SLITRK6	SeqId_16916_19
Transgelin	0.784632	0.737535	0.834736	1.59636e-14	0.81415	0.763545	0.868108	3.38895e-10	0.856702	0.802603	0.914447	3.36427e-06	0.315353	Q01995	TAGLN	SeqId_15640_54
Homogentisate 1,2-dioxygenase	1.19001	1.1396	1.24265	3.34155e-15	1.14292	1.09253	1.19564	6.38726e-09	1.11723	1.06618	1.17073	3.40265e-06	0.482194	Q93099	HGD	SeqId_9832_33
Retinal dehydrogenase 1	1.17516	1.12068	1.23229	2.66569e-11	1.13796	1.08359	1.19506	2.2924e-07	1.12303	1.06933	1.17942	3.45665e-06	0.52695	P00352	ALDH1A1	SeqId_11265_8
UDP-glucose 6-dehydrogenase	1.17433	1.12229	1.22878	3.67102e-12	1.14987	1.09747	1.20477	4.39999e-09	1.11723	1.06579	1.17116	4.0462e-06	0.726595	O60701	UGDH	SeqId_17755_5
Metalloproteinase inhibitor 2	0.829297	0.78647	0.874457	4.55757e-12	0.877694	0.830509	0.92756	3.70752e-06	0.878544	0.831465	0.92829	4.06679e-06	0.19001	P16035	TIMP2	SeqId_2278_61
Syndecan-3	1.26622	1.20515	1.33039	8.11649e-21	1.20821	1.14523	1.27467	4.39263e-12	1.13873	1.07731	1.20365	4.37999e-06	0.399678	O75056	SDC3	SeqId_16612_28
Sialidase-1	1.17091	1.12414	1.21962	3.26243e-14	1.13287	1.0849	1.18296	1.59388e-08	1.11408	1.0638	1.16673	4.53571e-06	0.428241	Q99519	NEU1	SeqId_15426_5
Pterin-4-alpha-carbinolamine dehydratase	1.17577	1.12863	1.22489	8.8107e-15	1.13398	1.08633	1.18371	9.38851e-09	1.11139	1.06232	1.16273	4.55545e-06	0.465131	P61457	PCBD1	SeqId_11313_100
Extracellular sulfatase Sulf-2	1.18793	1.13922	1.23873	7.5823e-16	1.1522	1.10153	1.2052	6.65354e-10	1.11842	1.06606	1.17336	4.76829e-06	0.329985	Q8IWU5	SULF2	SeqId_8305_18
Antithrombin-III	0.780264	0.740867	0.821756	6.21838e-21	0.819533	0.777217	0.864152	1.86848e-13	0.878447	0.830848	0.928772	5.12384e-06	0.142516	P01008	SERPINC1	SeqId_3344_60
Leptin	1.72005	1.58972	1.86106	1.77317e-41	1.57873	1.45273	1.71566	5.32304e-27	1.27711	1.14949	1.41889	5.27305e-06	1.11863	P41159	LEP	SeqId_8484_24
Osteomodulin	0.820596	0.777189	0.866428	9.99027e-13	0.839074	0.791834	0.889133	2.94726e-09	0.871882	0.821919	0.924882	5.27478e-06	0.495173	Q99983	OMD	SeqId_5358_3
Cerebral dopamine neurotrophic factor	0.738525	0.687043	0.793864	2.00883e-16	0.797914	0.742965	0.856928	5.60474e-10	0.851827	0.794934	0.912791	5.43505e-06	0.239546	Q49AH0	CDNF	SeqId_4962_52
Interleukin-18 receptor 1	1.18468	1.13549	1.23601	4.80868e-15	1.15005	1.09968	1.20272	9.44437e-10	1.11288	1.0627	1.16543	5.54552e-06	0.35433	Q13478	IL18R1	SeqId_14079_14
Potassium voltage-gated channel subfamily E regulatory beta subunit 5	0.811069	0.767416	0.857205	1.18489e-13	0.841989	0.796463	0.890118	1.32606e-09	0.879985	0.832569	0.930101	6.06585e-06	0.312617	Q9UJ90	KCNE5	SeqId_8908_14
Pigment epithelium-derived factor	1.27189	1.20112	1.34682	1.80123e-16	1.22032	1.15106	1.29374	2.39463e-11	1.14814	1.08138	1.21901	6.18329e-06	0.177267	P36955	SERPINF1	SeqId_9211_19
Collagen alpha-2(XI) chain	0.844542	0.800951	0.890506	4.13522e-10	0.853618	0.808815	0.900903	8.72982e-09	0.881017	0.833894	0.930803	6.28124e-06	0.482363	P13942	COL11A2	SeqId_11278_4
Neurocan core protein	0.733094	0.694272	0.774086	4.87072e-29	0.780956	0.737031	0.827499	5.72614e-17	0.867268	0.814961	0.922933	7.2309e-06	0.420331	O14594	NCAN	SeqId_15573_110
SLIT and NTRK-like protein 1	0.679068	0.635435	0.725698	3.24e-30	0.753604	0.703951	0.806759	4.12856e-16	0.851993	0.794302	0.913875	7.55153e-06	0.397452	Q96PX8	SLITRK1	SeqId_15539_15
Coagulation factor IXab	1.33415	1.2507	1.42317	2.16699e-18	1.23737	1.16149	1.3182	4.21694e-11	1.15314	1.08336	1.2274	7.663e-06	0.310215	P00740	F9	SeqId_5307_12
Tissue-type plasminogen activator	1.26335	1.19818	1.33206	5.09827e-18	1.19302	1.12988	1.25968	1.99227e-10	1.13474	1.07341	1.19957	8.248e-06	0.7649	P00750	PLAT	SeqId_2212_69
40S ribosomal protein S4, X isoform	1.18595	1.13053	1.2441	2.87473e-12	1.13016	1.07557	1.18752	1.27112e-06	1.12215	1.0667	1.18048	8.29712e-06	0.479079	P62701	RPS4X	SeqId_9758_17
Seizure 6-like protein	0.704442	0.667053	0.743927	2.36969e-36	0.775389	0.732035	0.821311	4.48684e-18	0.866729	0.813789	0.923114	8.67161e-06	0.21775	Q9BYH1	SEZ6L	SeqId_19563_3
Glycosaminoglycan xylosylkinase	0.781876	0.738426	0.827883	3.31503e-17	0.838929	0.791368	0.889349	3.67941e-09	0.874791	0.824575	0.928064	9.20281e-06	0.174184	O75063	FAM20B	SeqId_7198_197
Hazard ratio (HR) expressed as the risk of incident diabetes per 1 SD of the log2(protein RFU)
Significance level of P<0.05/4955 = 1.01 x 10-5. Proteins are ordered by smallest to largest Bonferroni significant p-value for Model 3.
Model 1 = age, sex, race, eGFR
Model 2 = Model 1 + smoking status, physical activity, total cholesterol, HDL-cholesterol, systolic blood pressure, hypertension medication use
Model 3 = Model 2 + BMI

## Sheet: ST2 disc adj for fg a1c
Supplemental Table 2. Results of the proteins associated with ~20 year diabetes risk, adjusted for demographics, cardiometabolic risk factors, fasting glucose, and HbA1c: The ARIC Study
Gene	Protein Name	HR	95% CI LL	95% CI UL	p-value	FDR	SD of protein	SeqID	UniprotID
SLITRK3	SLIT and NTRK-like protein 3	0.774529	0.72813	0.823885	5.21832e-16	2.58568e-12	0.666441	SeqId_10565_19	O94933
ADIPOQ	Adiponectin	0.773104	0.722969	0.826716	5.36292e-14	1.32866e-10	0.602441	SeqId_3554_24	Q15848
GHR	Growth hormone receptor	1.28002	1.19755	1.36818	3.72377e-13	6.15042e-10	0.493847	SeqId_2948_58	P10912
APOF	Apolipoprotein F	0.824966	0.781315	0.871056	4.0057e-12	4.96205e-09	0.610727	SeqId_12370_30	Q13790
CPM	Carboxypeptidase M	1.21874	1.15026	1.2913	2.02312e-11	1.68868e-08	0.327974	SeqId_9416_77	P14384
TPPP2	Tubulin polymerization-promoting protein family member 2	0.81213	0.764186	0.863082	2.04482e-11	1.68868e-08	0.402499	SeqId_12800_5	P59282
IGFBP1	Insulin-like growth factor-binding protein 1	0.815101	0.767281	0.865902	3.41105e-11	2.41454e-08	0.915234	SeqId_2771_35	P08833
RTN4R	Reticulon-4 receptor	1.21192	1.14295	1.28506	1.28308e-10	7.94707e-08	0.348821	SeqId_5105_2	Q9BZR6
UXS1	UDP-glucuronic acid decarboxylase 1	1.17777	1.11713	1.2417	1.30311e-09	7.17435e-07	0.296965	SeqId_8258_22	Q8NBZ7
IGFBP2	Insulin-like growth factor-binding protein 2	0.814627	0.761989	0.8709	1.78986e-09	8.86874e-07	0.765785	SeqId_8469_41	P18065
ADAMTSL1	ADAMTS-like protein 1	0.833129	0.784557	0.884709	2.57195e-09	1.15855e-06	0.300404	SeqId_16890_37	Q8N6G6
SEMA3C	Semaphorin-3C	1.15177	1.09927	1.20677	2.91474e-09	1.20354e-06	0.29858	SeqId_6448_36	Q99985
AFM	Afamin	1.19425	1.12572	1.26694	3.91016e-09	1.49037e-06	0.229028	SeqId_4763_31	P43652
HTRA1	Serine protease HTRA1	1.18939	1.12181	1.26105	6.2037e-09	2.19567e-06	0.296523	SeqId_15594_47	Q92743
GUSB	Beta-glucuronidase	1.18581	1.119	1.2566	8.39295e-09	2.77247e-06	0.754027	SeqId_15562_24	P08236
RBP5	Retinol-binding protein 5	1.16829	1.10782	1.23207	9.70806e-09	3.00646e-06	0.394761	SeqId_19241_31	P82980
RET	Proto-oncogene tyrosine-protein kinase receptor Ret	1.17642	1.11249	1.24402	1.20427e-08	3.51009e-06	0.661033	SeqId_3220_40	P07949
INS	Insulin	1.13752	1.08666	1.19077	3.3816e-08	9.30881e-06	0.339757	SeqId_4883_56	P01308
PCOLCE2	Procollagen C-endopeptidase enhancer 2	0.864174	0.820224	0.910479	4.21774e-08	1.09994e-05	0.294026	SeqId_6081_52	Q9UKZ9
HMBS	Porphobilinogen deaminase	1.16295	1.1011	1.22826	6.15578e-08	1.50513e-05	0.604677	SeqId_11530_37	P08397
KLK14	Kallikrein-14	0.854022	0.80655	0.904288	6.37897e-08	1.50513e-05	0.469441	SeqId_15544_25	Q9P0G3
MXRA8	Matrix-remodeling-associated protein 8	0.820733	0.763846	0.881857	7.02913e-08	1.58315e-05	0.272469	SeqId_10521_10	Q9BRK3
VCAM1	Vascular cell adhesion protein 1	1.19074	1.11686	1.26951	9.20315e-08	1.98268e-05	0.342889	SeqId_2967_8	P19320
UBB	PolyUbiquitin K48-linked	1.1513	1.0925	1.21327	1.38539e-07	2.86024e-05	0.269996	SeqId_6641_60	P0CG47
SIGLEC12	Sialic acid-binding Ig-like lectin 12	1.1606	1.09551	1.22956	4.24661e-07	8.41678e-05	0.418208	SeqId_8352_26	Q96PQ1
MAP1LC3A	Microtubule-associated proteins 1A/1B light chain 3A	0.857163	0.807386	0.91001	4.43454e-07	8.45121e-05	0.326413	SeqId_17781_191	Q9H492
ADH1A	Alcohol dehydrogenase 1A	1.13523	1.08038	1.19288	5.18325e-07	9.51223e-05	0.442378	SeqId_17396_23	P07327
ARFIP2	Arfaptin-2	0.864342	0.816446	0.915047	5.37871e-07	9.5184e-05	0.446837	SeqId_12630_8	P53365
S100A4	Protein S100-A4	0.860083	0.810739	0.91243	5.73089e-07	9.79192e-05	0.338823	SeqId_14116_129	P26447
PSAT1	Phosphoserine aminotransferase	1.14126	1.08348	1.20211	6.19097e-07	0.000101739	0.679102	SeqId_18342_2	Q9Y617
TINAGL1	Tubulointerstitial nephritis antigen-like	0.847943	0.794644	0.904816	6.36509e-07	0.000101739	0.317648	SeqId_11192_168	Q9GZM7
FGFBP1	Fibroblast growth factor-binding protein 1	0.865239	0.817125	0.916186	7.09616e-07	0.00010988	0.443167	SeqId_15494_11	Q14512
LGALS3BP	Galectin-3-binding protein	1.15004	1.08787	1.21576	8.21826e-07	0.000123398	0.520437	SeqId_5000_52	Q08380
ACY1	Aminoacylase-1	1.14496	1.08429	1.20901	1.09555e-06	0.00015966	0.960901	SeqId_3343_1	Q03154
AKR1D1	3-oxo-5-beta-steroid 4-dehydrogenase	1.12397	1.07182	1.17865	1.42595e-06	0.000201873	0.442658	SeqId_18398_1	P51857
GREM2	Gremlin-2	0.863947	0.813791	0.917193	1.64618e-06	0.000226579	0.315733	SeqId_5598_3	Q9H772
HS6ST2	Heparan-sulfate 6-O-sulfotransferase 2	0.85085	0.79617	0.909285	1.87911e-06	0.000251649	0.33949	SeqId_13524_25	Q96MM7
FGA|FGB|FGG	Fibrinogen	0.869691	0.820943	0.921335	2.09793e-06	0.000273559	0.230662	SeqId_2796_62	P02679|P02675|P02671
PRCP	Lysosomal Pro-X carboxypeptidase	1.16038	1.09084	1.23435	2.38693e-06	0.000303263	0.384828	SeqId_5722_78	P42785
GAS1	Growth arrest-specific protein 1	0.858358	0.805026	0.915223	3.06029e-06	0.000379094	0.260378	SeqId_5463_22	P54826
PTPRS	Receptor-type tyrosine-protein phosphatase S	0.878258	0.830976	0.928231	4.27412e-06	0.000516543	0.205259	SeqId_6049_64	Q13332
CADM2	Cell adhesion molecule 2	0.852908	0.796841	0.912919	4.51563e-06	0.000532736	0.280649	SeqId_16907_3	Q8N3J6
SLC14A1	Urea transporter 1	1.12555	1.06973	1.18428	5.17877e-06	0.000596763	0.301877	SeqId_13430_50	Q13336
CHRDL1	Chordin-like protein 1	0.869893	0.819129	0.923803	5.5352e-06	0.000623339	0.252598	SeqId_3362_61	Q9BU40
RBBP4	Histone-binding protein RBBP4	1.11916	1.06603	1.17495	5.72832e-06	0.000630752	0.317677	SeqId_15331_47	Q09028
MBD1	Methyl-CpG-binding domain protein 1	1.12546	1.06928	1.18459	6.06976e-06	0.000653819	0.402087	SeqId_14294_61	Q9UIS9
TMCC3	Transmembrane and coiled-coil domains protein 3	1.13599	1.07471	1.20077	6.59529e-06	0.000695312	0.445393	SeqId_8922_4	Q9ULS5
FGG	Fibrinogen gamma chain	0.875682	0.826498	0.927794	6.76088e-06	0.00069792	0.333235	SeqId_4989_7	P02679
COL11A2	Collagen alpha-2(XI) chain	0.880047	0.832241	0.9306	7.32822e-06	0.000735552	0.482363	SeqId_11278_4	P13942
TMEM132C	Transmembrane protein 132C	0.883914	0.837473	0.932929	7.42232e-06	0.000735552	0.344886	SeqId_7173_141	Q8N3T6
CAPN2	Calpain-2 catalytic subunit	0.879187	0.830562	0.930659	9.18501e-06	0.000875614	0.366358	SeqId_14684_17	P17655
HS6ST1	Heparan-sulfate 6-O-sulfotransferase 1	1.10719	1.05847	1.15814	9.18909e-06	0.000875614	0.182983	SeqId_5465_32	O60243
INHBC	Inhibin beta C chain	1.14253	1.07706	1.21198	9.60628e-06	0.000898096	0.479082	SeqId_6408_2	P55103
Adjusted for age, sex, race, eGFR, smoking status, physical activity, total cholesterol, HDL-cholesterol, systolic blood pressure, hypertension medication use, BMI, fasting glucose, HbA1c (Model 4)

## Sheet: ST3 PC adj
Supplemental Table 3. Results of the top 50 proteins associated with ~20 year risk of diabetes, adjusted for demographics, cardiometabolic risk factors, and 10 principal components of proteins: The ARIC Study
Gene Name	Protein Name	HR	HR 95% CI LL	HR 95% CI UL	p-value	UniprotID	SeqID
IGFBP2	Insulin-like growth factor-binding protein 2	0.69553	0.640562	0.755215	5.43949e-18	P18065	SeqId_8469_41
ADIPOQ	Adiponectin	0.752232	0.701428	0.806715	1.46098e-15	Q15848	SeqId_3554_24
SLITRK3	SLIT and NTRK-like protein 3	0.769736	0.721604	0.821078	1.96083e-15	O94933	SeqId_10565_19
OTC	Ornithine carbamoyltransferase, mitochondrial	0.790609	0.743804	0.840359	4.49057e-14	P00480	SeqId_15431_31
INS	Insulin	1.18413	1.13327	1.23727	4.50555e-14	P01308	SeqId_4883_56
PTPRU	Receptor-type tyrosine-protein phosphatase U	1.24171	1.17308	1.31435	8.47696e-14	Q92729	SeqId_8337_65
APOF	Apolipoprotein F	0.793115	0.74441	0.845007	7.59978e-13	Q13790	SeqId_12370_30
ASL	Argininosuccinate lyase	0.776561	0.723195	0.833864	3.36486e-12	P04424	SeqId_11241_8
INHBC	Inhibin beta C chain	1.34047	1.23211	1.45836	9.53731e-12	P55103	SeqId_6408_2
ACAA1	3-ketoacyl-CoA thiolase, peroxisomal	0.818476	0.771807	0.867966	2.27278e-11	P09110	SeqId_17782_23
ECHS1	Enoyl-CoA hydratase, mitochondrial	0.799739	0.746396	0.856893	2.22255e-10	P30084	SeqId_17787_1
DCXR	L-xylulose reductase	0.784752	0.727981	0.845951	2.50987e-10	Q7Z4W1	SeqId_17758_79
POR	NADPH--cytochrome P450 reductase	0.802936	0.750064	0.859534	2.69541e-10	P16435	SeqId_2731_29
GATM	Glycine amidinotransferase, mitochondrial	0.80494	0.751866	0.86176	4.51589e-10	P50440	SeqId_18188_12
IGFBP1	Insulin-like growth factor-binding protein 1	0.819735	0.76997	0.872716	4.95296e-10	P08833	SeqId_2771_35
FBP1	Fructose-1,6-bisphosphatase 1	0.789334	0.732596	0.850465	5.10758e-10	P09467	SeqId_7206_20
SHBG	Sex hormone-binding globulin	0.817798	0.767509	0.871383	5.24368e-10	P04278	SeqId_4929_55
PYGL	Glycogen phosphorylase, liver form	0.785413	0.727765	0.847629	5.29126e-10	P06737	SeqId_11441_11
ALDOB	Fructose-bisphosphate aldolase B	0.79979	0.745104	0.85849	6.31664e-10	P05062	SeqId_18185_118
RTN4R	Reticulon-4 receptor	1.21297	1.14039	1.29017	8.62576e-10	Q9BZR6	SeqId_5105_2
HSPE1	10 kDa heat shock protein, mitochondrial	0.76587	0.701539	0.8361	2.53992e-09	P61604	SeqId_17150_8
ALDOC	Fructose-bisphosphate aldolase C	0.838297	0.790406	0.88909	4.18396e-09	P09972	SeqId_9876_20
MRC2	C-type mannose receptor 2	1.22792	1.1445	1.31743	1.06834e-08	Q9UBG0	SeqId_3041_55
GRPEL1	GrpE protein homolog 1, mitochondrial	0.83783	0.787073	0.891859	2.86706e-08	Q9HAV7	SeqId_7113_1
CHRDL1	Chordin-like protein 1	0.836493	0.785226	0.891108	3.15335e-08	Q9BU40	SeqId_3362_61
GHR	Growth hormone receptor	1.25292	1.15603	1.35794	4.00868e-08	P10912	SeqId_2948_58
AKR7A3	Aflatoxin B1 aldehyde reductase member 3	0.840833	0.790299	0.894599	4.20675e-08	O95154	SeqId_18173_11
CPM	Carboxypeptidase M	1.1888	1.11646	1.26583	6.70584e-08	P14384	SeqId_9416_77
PUF60	Poly(U)-binding-splicing factor PUF60	0.832793	0.779213	0.890057	6.94221e-08	Q9UHX1	SeqId_10575_31
ACAT1	Acetyl-CoA acetyltransferase, mitochondrial	0.832123	0.778132	0.88986	7.90648e-08	P24752	SeqId_19197_95
HTRA2	Serine protease HTRA2, mitochondrial	0.825406	0.769181	0.885741	9.78209e-08	O43464	SeqId_3317_33
PRDX3	Thioredoxin-dependent peroxide reductase, mitochondrial	0.785161	0.718125	0.858454	1.08554e-07	P30048	SeqId_8358_30
SLC35G2	Solute carrier family 35 member G2	0.738638	0.658625	0.828372	2.23372e-07	Q8TBE7	SeqId_13501_10
GPI	Glucose-6-phosphate isomerase	0.782791	0.713494	0.858819	2.24052e-07	P06744	SeqId_4272_46
HSD17B10	3-hydroxyacyl-CoA dehydrogenase type-2	0.823518	0.764932	0.886591	2.51133e-07	Q99714	SeqId_4217_49
TLL1	Tolloid-like protein 1	1.18657	1.11169	1.26649	2.69423e-07	O43897	SeqId_6383_90
SEMA6A	Semaphorin-6A	1.20301	1.1202	1.29193	3.78415e-07	Q9H2E6	SeqId_7945_10
CTSB	Cathepsin B	0.850586	0.799013	0.905487	3.95759e-07	P07858	SeqId_8007_19
SEMA3C	Semaphorin-3C	1.14702	1.08752	1.20978	4.49178e-07	Q99985	SeqId_6448_36
SCARA5	Scavenger receptor class A member 5	1.17432	1.10297	1.25029	5.0532e-07	Q6ZMJ2	SeqId_10419_1
PLOD2	Procollagen-lysine,2-oxoglutarate 5-dioxygenase 2	1.15268	1.09048	1.21843	5.15143e-07	O00469	SeqId_6923_1
ADH4	Alcohol dehydrogenase 4	0.828745	0.7699	0.892088	5.77237e-07	P08319	SeqId_8325_37
CBLN4	Cerebellin-4	1.15164	1.08954	1.21728	5.98008e-07	Q9NTU7	SeqId_5688_65
GUSB	Beta-glucuronidase	1.17408	1.10177	1.25114	7.48822e-07	P08236	SeqId_15562_24
SET	Protein SET	1.1494	1.08765	1.21466	7.72804e-07	Q01105	SeqId_5364_7
SORD	Sorbitol dehydrogenase	0.844676	0.789698	0.903482	8.84219e-07	Q00796	SeqId_15447_45
GSS	Glutathione synthetase	0.874944	0.829443	0.92294	9.43836e-07	P48637	SeqId_15526_33
NR1H2	Oxysterols receptor LXR-beta	0.775578	0.700276	0.858977	1.07634e-06	P55055	SeqId_9016_12
NTN4	Netrin-4	1.15317	1.08819	1.22203	1.46364e-06	Q9HB63	SeqId_3327_27
ABHD10	Mycophenolic acid acyl-glucuronide esterase, mitochondrial	0.827042	0.76538	0.893671	1.55835e-06	Q9NUJ1	SeqId_17370_186
Adjusted for age, sex, race, eGFR, smoking status, physical activity, total cholesterol, HDL-cholesterol, systolic blood pressure, hypertension medication use, BMI, first 10 PCs proteins

## Sheet: ST4_m3_bonf_validat
Supplemental Table 4. List of proteins identified in discovery that replicated in the internal validation
seqid_in_sample	uniprot_id	entrezgenesymbol	Protein Name	Biological Process	Novel	Known	Pubmed	Validated in MEC
SeqId_3343_1	Q03154	ACY1	Aminoacylase-1	Hydrolyzes N-acetylated amino acids into free amino acids		1	32928870; 32385057	Yes
SeqId_6379_62	Q86TH1	ADAMTSL2	ADAMTS-like protein 2	Extracellular matrix organization, negative reulation of TGFBR signaling pathway		1	32385057	Yes
SeqId_17396_23	P07327	ADH1A	Alcohol dehydrogenase 1A	Alcohol and retinoid metabolic processes	1			Yes
SeqId_8325_37	P08319	ADH4	Alcohol dehydrogenase 4	Lipid metabolism; alcohol metabolic process	1			Yes
SeqId_3554_24	Q15848	ADIPOQ	Adiponectin	Adipokine involved in fat metabolism and insulin sensitivity		1		Yes
SeqId_4763_31	P43652	AFM	Afamin	Protein stabilization, protein transport within extracellular region, vitamin E transport	1			Yes
SeqId_15483_377	O00468	AGRN	Agrin	Differentiation	1			Yes
SeqId_18397_5	P17516	AKR1C4	Aldo-keto reductase family 1 member C4	Bile acid biosynthetic process, steroid metabolism	1			Yes
SeqId_18398_1	P51857	AKR1D1	3-oxo-5-beta-steroid 4-dehydrogenase	Bile acid catabolism, Lipid degradation, Lipid metabolism, Steroid metabolism	1			Yes
SeqId_18185_118	P05062	ALDOB	Fructose-bisphosphate aldolase B	Glycolysis		1	30202879	Yes
SeqId_12370_30	Q13790	APOF	Apolipoprotein F	Cholesterol metabolism and transport		1	32385057, 35130909, 35184183	Yes
SeqId_18411_83	Q9NXU5	ARL15	ADP-ribosylation factor-like protein 15	GTP binding	1			No
SeqId_7970_315	Q13508	ART3	Ecto-ADP-ribosyltransferase 3	Peptidyl-arginine ADP-ribosylation	1			Yes
SeqId_7218_87	P14415	ATP1B2	Sodium/potassium-transporting ATPase subunit beta-2	Cell adhesion, Sodium/potassium transport	1			Yes
SeqId_16907_3	Q8N3J6	CADM2	Cell adhesion molecule 2	Cell adhesion	1			Yes
SeqId_15487_164	P23141	CES1	Liver carboxylesterase 1	Lipid metabolism	1			Yes
SeqId_15468_14	Q03591	CFHR1	Complement factor H-related protein 1	Involved in complement regulation and cytolysis by host of symbiont cells	1			No
SeqId_9416_77	P14384	CPM	Carboxypeptidase M	Cleavage of C-terminal arginine or lysine residues from polypeptides		1	32385057; 36357677	Yes
SeqId_8007_19	P07858	CTSB	Cathepsin B	Proteolysis, epithelial cell differentiation, thyroid hormone generation	1			No
SeqId_17758_79	Q7Z4W1	DCXR	L-xylulose reductase	Carbohydrate metabolism, Glucose metabolism, Xylose metabolism	1			Yes
SeqId_6629_3	P60022	DEFB1	Beta-defensin 1	Bactericidal activity	1			Yes
SeqId_9484_75	Q14126	DSG2	Desmoglein-2	Cell adhesion		1		Yes
SeqId_7206_20	P09467	FBP1	Fructose-1,6-bisphosphatase 1	Carbohydrate metabolism, Gluconeogenesis		1	18375435	Yes
SeqId_15494_11	Q14512	FGFBP1	Fibroblast growth factor-binding protein 1	Positive regulation of blood vessel endothelial cell proliferation and fibroblast growth factor receptor signaling pathway	1			No
SeqId_2948_58	P10912	GHR	Growth hormone receptor	Receptor for pituitary growth hormone; body growth		1	32928870; 36357677	Yes
SeqId_7948_129	A6NH11	GLTPD2	Glycolipid transfer protein domain-containing protein 2	Ceramide transport, intermembrane lipid transfer	1			Yes
SeqId_16607_78	P06396	GSN	Gelsolin	Regulator of actin filament assembly and disassembly		1	32385057	Yes
SeqId_17138_8	P08263	GSTA1	Glutathione S-transferase A1	Lipid metabolism	1			Yes
SeqId_15562_24	P08236	GUSB	Beta-glucuronidase	Carbohydrate metabolism (glycosaminoglycans)	1			Yes
SeqId_13524_25	Q96MM7	HS6ST2	Heparan-sulfate 6-O-sulfotransferase 2	Enzymatic modification of 3'-phosphoadenosine 5'-phosphosulfate	1			Yes
SeqId_15594_47	Q92743	HTRA1	Serine protease HTRA1	Proteolysis and regulate insulin-like growth factors	1			Yes
SeqId_2771_35	P08833	IGFBP1	Insulin-like growth factor-binding protein 1	Promote insulin-like growth activity		1	32385057	Yes
SeqId_8469_41	P18065	IGFBP2	Insulin-like growth factor-binding protein 2	Inhibits IGF-mediated growth		1	30670722; 31446444; etc	Yes
SeqId_14079_14	Q13478	IL18R1	Interleukin-18 receptor 1	Imuune response		1		No
SeqId_13738_8	P08476	INHBA	Inhibin beta A chain	Inhibit secretion of follitropin by the pituitary gland		1		No
SeqId_6408_2	P55103	INHBC	Inhibin beta C chain	Enables cytokine activity; growth factor activity; hormone activity, TGFBR		1	32385057	Yes
SeqId_7145_1	Q06033	ITIH3	Inter-alpha-trypsin inhibitor heavy chain H3	Hyaluronan metabolic process	1			Yes
SeqId_15544_25	Q9P0G3	KLK14	Kallikrein-14	Proteolysis	1			No
SeqId_5000_52	Q08380	LGALS3BP	Galectin-3-binding protein	Cell adhesion		1	32928870	Yes
SeqId_2837_3	P08581	MET	Hepatocyte growth factor receptor	Transduces signals from the extracellular matrix into cytoplasm via HGF binding		1	32928870	Yes
SeqId_10521_10	Q9BRK3	MXRA8	Matrix-remodeling-associated protein 8	Cell adhesion		1	32385057	Yes
SeqId_7179_69	O94856	NFASC	Neurofascin	Cell adhesion		1	32385057	Yes
SeqId_11313_100	P61457	PCBD1	Pterin-4-alpha-carbinolamine dehydratase	Tetrahydrobiopterin biosynthesis, Transcription, Transcription regulation	1			Yes
SeqId_6923_1	O00469	PLOD2	Procollagen-lysine,2-oxoglutarate 5-dioxygenase 2	Cellular protein modification process, hydroxylysine biosynthetic process, peptidyl-lysine hydroxylation	1			No
SeqId_10612_18	O60568	PLOD3	Procollagen-lysine,2-oxoglutarate 5-dioxygenase 3	Collagen biosynthesis and modifying enzymes	1			No
SeqId_5722_78	P42785	PRCP	Lysosomal Pro-X carboxypeptidase	Glucose homeostasis, regulation of reactive oxygen species metabolic process, proteolysis, angiogenesis		1	32385057	Yes
SeqId_18342_2	Q9Y617	PSAT1	Phosphoserine aminotransferase	Amino-acid biosynthesis, Serine biosynthesis	1			Yes
SeqId_19617_5	Q14914	PTGR1	Prostaglandin reductase 1	Fatty acid metabolism, Lipid metabolism, Prostaglandin metabolism		1	32385057	No
SeqId_6049_64	Q13332	PTPRS	Receptor-type tyrosine-protein phosphatase S	Cell adhesion	1			Yes
SeqId_8337_65	Q92729	PTPRU	Receptor-type tyrosine-protein phosphatase U	Cell adhesion, Differentiation	1			Yes
SeqId_11257_1	P09417	QDPR	Dihydropteridine reductase	Tetrahydrobiopterin biosynthesis	1			No
SeqId_19241_31	P82980	RBP5	Retinol-binding protein 5	Intracellular transport of retinol and fatty acid transport	1			Yes
SeqId_3220_40	P07949	RET	Proto-oncogene tyrosine-protein kinase receptor Ret	Cell adhesion		1	32385057	Yes
SeqId_14636_25	P52758	RIDA	Ribonuclease UK114	Lipid metabolism	1			Not available in MEC
SeqId_5105_2	Q9BZR6	RTN4R	Reticulon-4 receptor	Cell surface receptor signaling pathway, positive regulation of GTPase activity and Rho protein signal transduction		1	32385057; 36357677	No
SeqId_2925_9	P05121	SERPINE1	Plasminogen activator inhibitor 1	Angiogenesis, negative regulation of plasminogen activation, positive regulation of inflammatory response		1	30670722; 31446444	No
SeqId_9211_19	P36955	SERPINF1	Pigment epithelium-derived factor	Cellular response to glucose stimulus, negative regulation of inflammatory response		1	22457810	No
SeqId_4929_55	P04278	SHBG	Sex hormone-binding globulin	Androgen transport		1	32385057, 35184183 etc	Yes
SeqId_8352_26	Q96PQ1	SIGLEC12	Sialic acid-binding Ig-like lectin 12	Cell adhesion	1			No
SeqId_2742_68	Q9Y286	SIGLEC7	Sialic acid-binding Ig-like lectin 7	Sialic acid dependent binding to cells		1	31446444	No
SeqId_10565_19	O94933	SLITRK3	SLIT and NTRK-like protein 3	Axonogenesis, Positive regulation of synapse assembly, regulation of presynapse assembly, synaptic membrane adhesion		1	32385057	Yes
SeqId_3009_3	Q03167	TGFBR3	Transforming growth factor beta receptor type 3	Binds to other TGF-beta receptor superfamily members		1	32928870	Yes
SeqId_11192_168	Q9GZM7	TINAGL1	Tubulointerstitial nephritis antigen-like	Endosomal transport; immune response; proteolysis	1			Yes
SeqId_16307_22	Q6UXZ4	UNC5D	Netrin receptor UNC5D	Apoptosis	1			Yes
					35	29

## Sheet: ST5 MEC proteins
Supplemental Table 5. Plasma protein associations with type 2 diabetes in the MEC cohort (n = 1,838): with 'Leisure-time physical activities' variable
seqid_in_sample	uniprot_id	entrezgeneid	entrezgenesymbol	targetfullname	Beta	SE	P_value	P.FDR	OR	95_CI_LOW	95_CI_HIGH	Pass_QC*
SeqId_3554_24	Q15848	9370	ADIPOQ	Adiponectin	-0.6	0.07	1.39e-17	9.45e-16	0.55	0.48	0.63	PASS
SeqId_10565_19	O94933	22865	SLITRK3	SLIT and NTRK-like protein 3	-0.52	0.07	7.23e-15	2.46e-13	0.6	0.52	0.68	PASS
SeqId_10521_10	Q9BRK3	54587	MXRA8	Matrix-remodeling-associated protein 8	-0.59	0.08	2.9e-14	5.36e-13	0.55	0.47	0.64	PASS
SeqId_8325_37	P08319	127	ADH4	Alcohol dehydrogenase 4	0.46	0.06	3.15e-14	5.36e-13	1.59	1.41	1.79	PASS
SeqId_3343_1	Q03154	95	ACY1	Aminoacylase-1	0.49	0.06	4.18e-14	5.68e-13	1.63	1.44	1.85	PASS
SeqId_7206_20	P09467	2203	FBP1	Fructose-1,6-bisphosphatase 1	0.43	0.06	3.02e-13	3.42e-12	1.54	1.37	1.73	PASS
SeqId_6049_64	Q13332	5802	PTPRS	Receptor-type tyrosine-protein phosphatase S	-0.42	0.06	3.85e-13	3.74e-12	0.66	0.59	0.74	PASS
SeqId_8469_41	P18065	3485	IGFBP2	Insulin-like growth factor-binding protein 2	-0.52	0.07	4.57e-13	3.89e-12	0.59	0.51	0.68	PASS
SeqId_18185_118	P05062	229	ALDOB	Fructose-bisphosphate aldolase B	0.41	0.06	1.51e-12	1.14e-11	1.5	1.34	1.68	PASS
SeqId_18342_2	Q9Y617	29968	PSAT1	Phosphoserine aminotransferase	0.4	0.06	3.01e-12	2.05e-11	1.49	1.33	1.67	PASS
SeqId_6629_3	P60022	1672	DEFB1	Beta-defensin 1	0.41	0.06	3.64e-12	2.25e-11	1.51	1.35	1.7	PASS
SeqId_17396_23	P07327	124	ADH1A	Alcohol dehydrogenase 1A	0.39	0.06	7.37e-12	4.18e-11	1.48	1.32	1.66	PASS
SeqId_2948_58	P10912	2690	GHR	Growth hormone receptor	0.49	0.07	1.04e-11	5.42e-11	1.63	1.42	1.88	PASS
SeqId_15594_47	Q92743	5654	HTRA1	Serine protease HTRA1	0.42	0.06	6.65e-11	3.23e-10	1.52	1.34	1.72	PASS
SeqId_6379_62	Q86TH1	9719	ADAMTSL2	ADAMTS-like protein 2	0.38	0.06	8.52e-11	3.86e-10	1.46	1.3	1.63	PASS
SeqId_7970_315	Q13508	419	ART3	Ecto-ADP-ribosyltransferase 3	-0.47	0.07	2.01e-10	8.56e-10	0.63	0.54	0.72	PASS
SeqId_16907_3	Q8N3J6	253559	CADM2	Cell adhesion molecule 2	-0.4	0.07	2.88e-09	1.1e-08	0.67	0.59	0.76	FLAG
SeqId_3009_3	Q03167	7049	TGFBR3	Transforming growth factor beta receptor type 3	-0.35	0.06	2.92e-09	1.1e-08	0.7	0.62	0.79	PASS
SeqId_9416_77	P14384	1368	CPM	Carboxypeptidase M	0.35	0.06	5.19e-09	1.86e-08	1.43	1.27	1.61	PASS
SeqId_19241_31	P82980	83758	RBP5	Retinol-binding protein 5	0.33	0.06	5.5e-09	1.87e-08	1.39	1.25	1.56	PASS
SeqId_17138_8	P08263	2938	GSTA1	Glutathione S-transferase A1	0.31	0.05	7.96e-09	2.58e-08	1.37	1.23	1.52	PASS
SeqId_11192_168	Q9GZM7	64129	TINAGL1	Tubulointerstitial nephritis antigen-like	-0.36	0.06	1.09e-08	3.38e-08	0.7	0.61	0.79	PASS
SeqId_16307_22	Q6UXZ4	137970	UNC5D	Netrin receptor UNC5D	-0.37	0.07	1.24e-08	3.67e-08	0.69	0.6	0.78	PASS
SeqId_18398_1	P51857	6718	AKR1D1	3-oxo-5-beta-steroid 4-dehydrogenase	0.31	0.06	1.44e-08	4.08e-08	1.37	1.23	1.52	PASS
SeqId_11313_100	P61457	5092	PCBD1	Pterin-4-alpha-carbinolamine dehydratase	0.31	0.06	2.12e-08	5.78e-08	1.36	1.22	1.52	FLAG
SeqId_18397_5	P17516	1109	AKR1C4	Aldo-keto reductase family 1 member C4	0.32	0.06	2.24e-08	5.85e-08	1.38	1.23	1.54	FLAG
SeqId_15483_377	O00468	375790	AGRN	Agrin	0.33	0.06	3.98e-08	1e-07	1.39	1.23	1.56	PASS
SeqId_7179_69	O94856	23114	NFASC	Neurofascin	0.3	0.06	1.01e-07	2.44e-07	1.35	1.21	1.51	PASS
SeqId_15562_24	P08236	2990	GUSB	Beta-glucuronidase	0.32	0.06	1.1e-07	2.59e-07	1.38	1.22	1.55	PASS
SeqId_6408_2	P55103	3626	INHBC	Inhibin beta C chain	0.35	0.07	1.19e-07	2.7e-07	1.42	1.25	1.61	PASS
SeqId_4929_55	P04278	6462	SHBG	Sex hormone-binding globulin	-0.34	0.06	1.26e-07	2.76e-07	0.71	0.63	0.81	PASS
SeqId_7948_129	A6NH11	388323	GLTPD2	Glycolipid transfer protein domain-containing protein 2	0.32	0.06	3.82e-07	8.12e-07	1.37	1.22	1.55	PASS
SeqId_4763_31	P43652	173	AFM	Afamin	0.31	0.06	1.08e-06	2.23e-06	1.37	1.21	1.55	PASS
SeqId_8337_65	Q92729	10076	PTPRU	Receptor-type tyrosine-protein phosphatase U	0.27	0.06	1.98e-06	3.96e-06	1.31	1.17	1.46	PASS
SeqId_16607_78	P06396	2934	GSN	Gelsolin	-0.27	0.06	2.26e-06	4.38e-06	0.76	0.68	0.85	FLAG
SeqId_17758_79	Q7Z4W1	51181	DCXR	L-xylulose reductase	0.27	0.06	2.76e-06	5.21e-06	1.31	1.17	1.47	PASS
SeqId_5000_52	Q08380	3959	LGALS3BP	Galectin-3-binding protein	0.28	0.06	7e-06	1.29e-05	1.32	1.17	1.49	PASS
SeqId_9484_75	Q14126	1829	DSG2	Desmoglein-2	-0.27	0.06	7.37e-06	1.32e-05	0.76	0.68	0.86	PASS
SeqId_2837_3	P08581	4233	MET	Hepatocyte growth factor receptor	-0.25	0.06	1.44e-05	2.51e-05	0.78	0.7	0.87	PASS
SeqId_3220_40	P07949	5979	RET	Proto-oncogene tyrosine-protein kinase receptor Ret	0.29	0.07	1.52e-05	2.58e-05	1.33	1.17	1.52	PASS
SeqId_15487_164	P23141	1066	CES1	Liver carboxylesterase 1	0.24	0.06	1.71e-05	2.84e-05	1.27	1.14	1.41	PASS
SeqId_2771_35	P08833	3484	IGFBP1	Insulin-like growth factor-binding protein 1	-0.27	0.06	2.34e-05	3.79e-05	0.76	0.67	0.87	PASS
SeqId_7218_87	P14415	482	ATP1B2	Sodium/potassium-transporting ATPase subunit beta-2	-0.25	0.06	3.43e-05	5.3e-05	0.78	0.69	0.87	PASS
SeqId_5722_78	P42785	5547	PRCP	Lysosomal Pro-X carboxypeptidase	0.35	0.09	7.53e-05	0.000113764	1.42	1.19	1.69	PASS
SeqId_13524_25	Q96MM7	90161	HS6ST2	Heparan-sulfate 6-O-sulfotransferase 2	-0.28	0.07	0.000114382	0.000169086	0.75	0.65	0.87	PASS
SeqId_7145_1	Q06033	3699	ITIH3	Inter-alpha-trypsin inhibitor heavy chain H3	-0.22	0.06	0.000142617	0.000206339	0.8	0.71	0.9	PASS
SeqId_12370_30	Q13790	319	APOF	Apolipoprotein F	-0.19	0.06	0.000784298	0.00108841	0.83	0.74	0.92	PASS
SeqId_15494_11	Q14512	9982	FGFBP1	Fibroblast growth factor-binding protein 1	-0.18	0.06	0.00139054	0.00189113	0.83	0.75	0.93	PASS
SeqId_5105_2	Q9BZR6	65078	RTN4R	Reticulon-4 receptor	0.19	0.06	0.00177388	0.00236517	1.21	1.07	1.36	PASS
SeqId_2925_9	P05121	5054	SERPINE1	Plasminogen activator inhibitor 1	0.18	0.06	0.00218378	0.00285571	1.19	1.07	1.33	FLAG
SeqId_2742_68	Q9Y286	27036	SIGLEC7	Sialic acid-binding Ig-like lectin 7	0.16	0.06	0.00388933	0.00487631	1.18	1.05	1.31	PASS
SeqId_8352_26	Q96PQ1	89858	SIGLEC12	Sialic acid-binding Ig-like lectin 12	0.16	0.06	0.00394408	0.00487631	1.17	1.05	1.31	PASS
SeqId_15468_14	Q03591	3078	CFHR1	Complement factor H-related protein 1	0.16	0.06	0.00514145	0.00624319	1.18	1.05	1.32	PASS
SeqId_15544_25	Q9P0G3	43847	KLK14	Kallikrein-14	-0.15	0.06	0.00958988	0.0114406	0.86	0.77	0.97	PASS
SeqId_19617_5	Q14914	22949	PTGR1	Prostaglandin reductase 1	0.14	0.06	0.010414	0.0121704	1.15	1.03	1.29	FLAG
SeqId_13738_8	P08476	3624	INHBA	Inhibin beta A chain	0.14	0.06	0.0105596	0.0121704	1.15	1.03	1.28	PASS
SeqId_9211_19	P36955	5176	SERPINF1	Pigment epithelium-derived factor	0.15	0.06	0.0140039	0.0156109	1.16	1.03	1.31	PASS
SeqId_14079_14	Q13478	8809	IL18R1	Interleukin-18 receptor 1	0.13	0.05	0.0157636	0.0172891	1.14	1.02	1.26	PASS
SeqId_8007_19	P07858	1508	CTSB	Cathepsin B	-0.14	0.06	0.0164095	0.0177118	0.87	0.77	0.97	PASS
SeqId_18411_83	Q9NXU5	54622	ARL15	ADP-ribosylation factor-like protein 15	0.11	0.06	0.0403141	0.0428337	1.12	1.01	1.25	PASS
SeqId_6923_1	O00469	5352	PLOD2	Procollagen-lysine,2-oxoglutarate 5-dioxygenase 2	0.09	0.05	0.0889083	0.0930117	1.1	0.99	1.22	PASS
SeqId_11257_1	P09417	5860	QDPR	Dihydropteridine reductase	0.08	0.05	0.127902	0.131778	1.09	0.98	1.21	PASS
SeqId_10612_18	O60568	8985	PLOD3	Procollagen-lysine,2-oxoglutarate 5-dioxygenase 3	0.08	0.06	0.137483	0.139535	1.09	0.97	1.21	PASS
* Aptamer QC by Somalogic
				0.000793651

## Sheet: ST6 calibration
Supplemental Table 6. Calibration of predictive model derived within the overall ARIC discovery: mean observed and predicted 20-year risk of diabetes within the internal validation set
	Discovery		Internal Validation
Decile of risk	Observed	Predicted	Observed	Predicted
1	0.0457853	0.0485275	0.030382	0.0799217
2	0.0758706	0.0843613	0.0528438	0.0926454
3	0.103585	0.0728199	0.0743042	0.132991
4	0.134458	0.148613	0.0968001	0.165449
5	0.172241	0.166999	0.125576	0.209509
6	0.222808	0.250295	0.156456	0.232972
7	0.283788	0.292912	0.200371	0.284325
8	0.365869	0.360236	0.268797	0.366662
9	0.50536	0.497824	0.38908	0.511819
10	0.78751	0.75534	0.656095	0.696401

## Sheet: ST7 IPA
Supplemental Table 7. The top 25 canonical pathways determined by IPA from proteins associated with incident diabetes
Ingenuity Canonical Pathways	-log(B-H p-value)	Ratio	z-score	Molecules
Acute Phase Response Signaling	12.2	0.13	-0.577	AHSG,APCS,C2,C9,CFB,CP,CRP,FGG,IL1R1,IL1RN,ITIH2,ITIH3,KLKB1,MAP2K2,MAP2K4,RBP1,RBP5,SAA1,SERPINA3,SERPIND1,SERPINE1,SERPINF1,SERPING1,SOCS3
Complement System	7.45	0.25	-0.378	C2,C9,CD55,CD59,CFB,CFH,CFI,CR1,SERPING1
Intrinsic Prothrombin Activation Pathway	6.91	0.22	-1	COL11A2,COL18A1,F9,FGG,KLK10,KLK14,KLK8,KLKB1,SERPINC1
Coagulation System	6.35	0.229	0	F9,FGG,KLKB1,PLAT,SERPINC1,SERPIND1,SERPINE1,TFPI
Ethanol Degradation II	6.03	0.259	2.646	ADH1A,ADH1C,ADH4,ADH5,ADH6,ALDH1A1,ALDH2
LXR/RXR Activation	5.79	0.106	0.832	AHSG,APOC3,APOE,APOF,C9,CD14,GC,IL1R1,IL1R2,IL1RN,LYZ,SAA1,SERPINF1
FXR/RXR Activation	5.71	0.104	NaN	AHSG,APOC3,APOE,APOF,C9,FBP1,FGF19,GC,IL1RN,INS,MAP2K4,SAA1,SERPINF1
Noradrenaline and Adrenaline Degradation	5.69	0.233	2.646	ADH1A,ADH1C,ADH4,ADH5,ADH6,ALDH1A1,ALDH2
Hepatic Fibrosis / Hepatic Stellate Cell Activation	5.65	0.0842	NaN	CD14,COL11A2,COL15A1,COL18A1,COL28A1,COL9A1,FGFR1,IFNGR2,IGFBP4,IL1R1,IL1R2,LEP,MET,MMP2,SERPINE1,TIMP2
Retinoate Biosynthesis I	5.39	0.212	2.449	ADH1C,ADH4,AKR1C1/AKR1C2,AKR1C4,ALDH1A1,RBP1,RBP5
Axonal Guidance Signaling	5.37	0.055	NaN	ADAMTS15,BMP1,CXCL12,EFNA5,EFNB2,EPHA10,EPHA2,EPHB4,EPHB6,MAP2K2,MET,MMP2,MMP3,NRP2,NTN4,NTRK3,PLCB1,PLXNB2,PLXND1,RTN4R,SDCBP,SEMA3C,SEMA4B,SEMA6B,UNC5B,UNC5C,UNC5D
IL-15 Production	5.14	0.1	-1.732	DDR2,EPHA2,EPHB4,FGFR1,FLT3LG,MAP2K4,MET,MUSK,NTRK3,RET,ROR1,YES1
Atherosclerosis Signaling	4.92	0.0952	NaN	APOC3,APOE,APOF,COL11A2,COL18A1,CXCL12,IL1RN,LYZ,MMP3,SELE,SELPLG,TNFSF12
STAT3 Pathway	4.62	0.0889	-1.414	FGFR1,GHR,IGF2R,IL15RA,IL18R1,IL1R1,IL1R2,MAP2K2,MAP2K4,NTRK3,SOCS3,TGFBR3
LPS/IL-1 Mediated Inhibition of RXR Function	4.23	0.0679	-1.633	ALDH1A1,ALDH2,APOE,CAT,CD14,FABP3,GSTA1,HMGCS1,HS6ST2,IL1R1,IL1R2,IL1RN,MAP2K4,SOD3,UST
Inhibition of Matrix Metalloproteases	3.93	0.158	-0.816	MMP19,MMP2,MMP3,THBS2,TIMP2,TIMP4
SPINK1 Pancreatic Cancer Pathway	3.88	0.127	0.378	CPM,CTSA,CTSB,KLK10,KLK14,KLK8,KLKB1
Wound Healing Signaling Pathway	3.87	0.063	-1.291	COL11A2,COL15A1,COL18A1,COL28A1,COL9A1,FGF7,IFNGR2,IL1R1,IL1R2,IL1RN,LEP,MAP2K2,MAP2K4,TGFBR3,TNFSF12
Serotonin Degradation	3.79	0.123	2.646	ADH1A,ADH1C,ADH4,ADH5,ADH6,ALDH1A1,ALDH2
Granulocyte Adhesion and Diapedesis	3.56	0.069	NaN	CCL16,CCL25,CXCL12,IL1R1,IL1R2,IL1RN,MMP19,MMP2,MMP3,SDC3,SELE,SELPLG
Osteoarthritis Pathway	3.46	0.0603	0	ACAN,ADIPOQ,AGER,DDR2,FADD,FGFR1,HTRA1,IL1R1,IL1R2,LEP,MATN3,MMP3,S100A9,SPP1
Pulmonary Fibrosis Idiopathic Signaling Pathway	3.39	0.0528	-2	COL11A2,COL15A1,COL18A1,COL28A1,COL9A1,CXCL12,EFNB2,EPHB4,FGFR1,MAP2K4,MMP19,MMP2,MMP3,NOTCH3,RBBP4,SERPINE1,TGFBR3
UDP-D-xylose and UDP-D-glucuronate Biosynthesis	3.37	1	NaN	UGDH,UXS1
Methylglyoxal Degradation III	3.36	0.222	NaN	ADH4,AKR1C1/AKR1C2,AKR1C4,PTGR1
Maturity Onset Diabetes of Young (MODY) Signaling	2.98	0.0909	NaN	ADIPOQ,ALDOB,APOC3,APOE,APOF,CACNA2D3,INS

## Sheet: ST8 upstream
Supplemental Table 8. The top 25 upstream regulators predicted to be activated and inhibited by diabetes-associated proteins
Upstream Regulator	Expr Log Ratio	Molecule Type	Activation z-score	p-value of overlap	B-H corrected p-value	Target Molecules in Dataset
IL17A	-0.001	cytokine	1.207	9.68e-08	0.000113	ACAN,CD14,CD163,CRP,GUSB,HEXB,IL1RN,MMP3,S100A9,SELE,SOCS3,TNFSF12
TNF	0.017	cytokine	1.729	3.52e-07	0.000176	A4GALT,ADIPOQ,ALDH2,APOE,ARHGEF10,CAT,CD163,CD59,CFB,CRP,FGG,GSTA1,HEXB,IGFBP2,IL1R1,IL1RN,INHBA,KYNU,MAP2K4,MET,MMP2,MMP3,PIGR,PLOD2,PSME2,S100A9,SAA1,SELE,SEMA3C,SERPINE1,TP53I3
TWIST1		transcription regulator	-1.161	6.97e-07	0.000176	ALDH1A1,CXCL12,DDR2,FMOD,IGFBP1,MMP2,PRL,S100A4,YBX1
CG		complex	0.177	7.44e-07	0.000176	ALDH1A1,C2,CAT,CFB,CPM,CXCL12,EPHB6,ESM1,FGF7,FLRT2,HMGCS1,IFI16,IL15RA,IL18R1,IL1R2,INHBA,MMP2,MMP3,PLAT,RECQL,SOCS3,STC1
BSG	-0.039	transporter	-1.276	9.1e-07	0.000176	ALDOB,APOC3,CRP,CXCL12,MMP2,MMP3,SERPINE1
BTG2	0.024	transcription regulator	0.563	9.1e-07	0.000176	CAT,IGFBP2,IGFBP4,IGFBP6,MMP3,SERPINE1,TIMP2
SMARCA4		transcription regulator	-0.333	6.28e-06	0.00104	ALDH2,ANTXR2,AZGP1,CARD17,CP,CPM,CTSB,DUSP13,FBP1,FGFBP1,FGG,HEXB,IFI16,IGFBP4,IL15RA,INHBA,MFGE8,MMP2,NRP2,PLAT,RBP1,SOD3,SPP1,ST3GAL1,TAGLN,TMCC3
IL1B	0.018	cytokine	0.901	8.26e-06	0.0012	A4GALT,ACAN,APOE,CAT,CRP,FGG,GSTA1,GUSB,HEXB,IL1RN,INS,MMP3,PCSK2,SAA1,SELE,SERPINA3,SERPINE1,SOCS3,TNFAIP6
PLA2R1	-0.037	transmembrane receptor	1.633	1.88e-05	0.00235	ALDH2,BDH2,CTSA,CTSD,CYB5R3,TPP1
HNF1A	-0.007	transcription regulator		2.02e-05	0.00235	ADH1A,ADH4,AHSG,AKR1C4,APCS,BCL6,CRP,HAVCR1,IGFBP1,INS,SERPING1,TFRC
EHF	-0.025	transcription regulator	1	2.52e-05	0.00266	IL1RN,KLK8,NOTCH3,PLAT,S100A9,SAA1,SERPINA3,SERPINE1,TFPI
FGF2	-0.004	growth factor	-0.246	2.78e-05	0.00269	EFNB2,FGFR1,SELE,SERPINE1,ST3GAL1,TFPI,TGFBR3
SLC2A1		transporter		3.84e-05	0.00343	IGFBP1,MMP2,PRL
TFEB		transcription regulator	0.651	0.000108	0.00894	CTSB,CTSD,NEU1,PSAP,TPP1
IFNG	0.025	cytokine	0.541	0.000121	0.00896	ADIPOQ,CARD17,CAT,CD163,CD2,CP,DDR2,DEFB1,HTRA1,IGFBP4,IL1RN,INS,LGALS3BP,MMP2,PCSK2,PIGR,PTN,SELE,SOCS3,TNFSF12
USF1		transcription regulator		0.000123	0.00896	CD2,GHRL,IGF2R,PIGR,SERPINE1,SPP1
ESR1		ligand-dependent nuclear receptor	0.476	0.00016	0.011	CAPN2,CCN5,CD55,CP,CTSB,CTSD,CXCL12,DSG2,EFEMP1,FGFR1,GHR,HNRNPD,IGFBP2,LGALS3BP,NOTCH3,POR,PRL,RET,SERPINE1,TAGLN,TNFAIP6
IRF2	0.033	transcription regulator	0.378	0.000219	0.0141	CD14,CES1,CFB,FGG,HGD,IGFBP1,PSME2,PTGR1
TCF		group		0.000262	0.0153	ALDH1A1,HTRA1,IL1R1,MMP2,SAA1,SEMA3C,SERPINA3,SERPINE1
USF2		transcription regulator		0.000288	0.0153	CD2,GHRL,IGF2R,PIGR,SERPINE1
PI3K (family)		group	-0.46	0.00032	0.0153	AKR1C1/AKR1C2,CAT,CTSD,CXCL12,DEFB1,LEP,MMP2,MMP3,SERPINE1
LEP	0.245	growth factor	0.092	0.00033	0.0153	ACAT1,CRP,FADD,IL1RN,INS,SOCS3
GABARAPL1	0.002	other	-0.447	0.000342	0.0153	CTSB,GUSB,IDS,PSAP,TPP1
GABARAP	-0.011	transporter	-0.447	0.000342	0.0153	CTSB,GUSB,IDS,PSAP,TPP1

## Sheet: ST9 PWAS
Supplemental Table 9. Genetic models for the proteins that validated internally in association with diabetes risk
Protein name	Gene	Chromosome number	Heritability of the gene	r2 for protein model	Number of SNPs	Genetic model association with diabetes risk
						Z-statistic	p-value
Sex hormone-binding globulin	SHBG	17	0.05799	0.065	100	-5.3152	1.07e-07
Sodium/potassium-transporting ATPase subunit beta-2	ATP1B2	17	0.11194	0.14	47	4.6258	3.73e-06
Glutathione S-transferase A1	GSTA1	6	0.1122	0.28	64	3.57477	0.000351
Proto-oncogene tyrosine-protein kinase receptor Ret	RET	10	0.10968	0.15	116	2.9778	0.0029
Phosphoserine aminotransferase	PSAT1	9	0.06013	0.062	18	2.6145	0.00894
Kallikrein-14	KLK14	19	0.16196	0.11	104	-2.3856	0.0171
Ecto-ADP-ribosyltransferase 3	ART3	4	0.09853	0.11	92	1.796	0.0725
Aldo-keto reductase family 1 member C4	AKR1C4	10	0.11617	0.29	43	1.6689	0.0951
Dihydropteridine reductase	QDPR	4	0.27052	0.26	67	-1.6277	0.103583
Inhibin beta A chain	INHBA	7	0.00859	0.0036	18	1.6211	0.10499
3-oxo-5-beta-steroid 4-dehydrogenase	AKR1D1	7	0.01342	0.0091	30	1.5906	0.11171
Transforming growth factor beta receptor type 3	TGFBR3	1	0.04179	0.029	75	1.5402	0.124
Serine protease HTRA1	HTRA1	10	0.05346	0.038	58	-1.4291	0.153
Sialic acid-binding Ig-like lectin 7	SIGLEC7	19	0.25818	0.12	103	1.41195	0.158
Receptor-type tyrosine-protein phosphatase S	PTPRS	19	0.01132	0.003	44	1.29772	0.194
Netrin receptor UNC5D	UNC5D	8	0.06753	0.061	59	1.247	0.212
Adiponectin	ADIPOQ	3	0.11006	0.11	43	1.1864	0.235
Inhibin beta C chain	INHBC	12	0.22299	0.49	35	1.1713	0.241
Growth hormone receptor	GHR	5	0.1449	0.1	26	1.1594	0.246
Lysosomal Pro-X carboxypeptidase	PRCP	11	0.05268	0.043	63	1.096	0.273085
Insulin-like growth factor-binding protein 2	IGFBP2	2	0.01589	0.011	34	-1.06386	0.287
Cell adhesion molecule 2	CADM2	3	0.02	0.0078	23	-1.06103	0.289
Sialic acid-binding Ig-like lectin 12	SIGLEC12	19	0.21827	0.32	16	1.03064	0.303
Galectin-3-binding protein	LGALS3BP	17	0.03306	0.03	71	-0.9907	0.322
Matrix-remodeling-associated protein 8	MXRA8	1	0.00991	0.0078	26	0.9806	0.327
Prostaglandin reductase 1	PTGR1	9	0.28758	0.27	119	0.9277	0.354
Pigment epithelium-derived factor	SERPINF1	17	0.20169	0.18	170	-0.7831	0.434
Carboxypeptidase M	CPM	12	0.04146	0.027	25	0.7793	0.436
Tubulointerstitial nephritis antigen-like	TINAGL1	1	0.01705	0.0066	42	0.7742	0.439
Neurofascin	NFASC	1	0.18841	0.17	70	0.7662	0.444
Cathepsin B	CTSB	8	0.26132	0.25	150	-0.761	0.447
Inter-alpha-trypsin inhibitor heavy chain H3	ITIH3	3	0.37047	0.29	51	-0.71751	0.473
Beta-glucuronidase	GUSB	7	0.05011	0.024	65	0.7086	0.47856
Beta-defensin 1	DEFB1	8	0.09985	0.11	67	-0.682	0.495
Desmoglein-2	DSG2	18	0.12695	0.1	91	-0.668	0.504
Glycolipid transfer protein domain-containing protein 2	GLTPD2	17	0.09076	0.061	45	-0.6427	0.52
Aminoacylase-1	ACY1	3	0.03411	0.01	18	0.63444	0.526
Interleukin-18 receptor 1	IL18R1	2	0.16442	0.32	90	0.58966	0.555
Plasminogen activator inhibitor 1	SERPINE1	7	0.02664	0.02	59	0.541	0.58854
Complement factor H-related protein 1	CFHR1	1	0.221	0.3	67	0.5391	0.59
Liver carboxylesterase 1	CES1	16	0.05679	0.027	66	-0.41077	0.681
ADAMTS-like protein 2	ADAMTSL2	9	0.02161	0.015	59	0.4027	0.687
Afamin	AFM	4	0.06431	0.067	70	-0.3775	0.705795
Reticulon-4 receptor	RTN4R	22	0.16685	0.13	73	0.3427	0.73186
Alcohol dehydrogenase 1A	ADH1A	4	0.12179	0.065	34	-0.3363	0.73662
SLIT and NTRK-like protein 3	SLITRK3	3	0.15358	0.092	115	-0.22934	0.819
Gelsolin	GSN	9	0.06051	0.045	44	-0.0737	0.941
Agrin	AGRN	1	0.0733	0.045	26	-0.0555	0.956
Receptor-type tyrosine-protein phosphatase U	PTPRU	1	0.07169	0.048	89	0.0372	0.97
Hepatocyte growth factor receptor	MET	7	0.06393	0.04	65	-0.026	0.97925

[truncated: 1 more sheets: ST10 studies]
